# Supplementary material
Source: Elsevier journal article supplement (https://www.sciencedirect.com/science/article/pii/S2530064420300602)
Supplement: mmc1 [file S2530064420300602:mmc1.docx]

**Appendix A.** Dataset.

**Appendix SM1.** Bernard's probabilistic sampling procedure to estimate the interview sample size.

**Table S1.** Randomly selected villages (n=12) from a set of 23 rural villages with information on human-eagle conflict collected between 2006 and 2012 by CORPOGUAVIO (www.corpoguavio.gov.co). The population size (N) and households in each selected village are provided.

**Table S2.** Population size (*N*), households, and sample size (*n*) in each selected village.

**Table S3.** Descriptive statistic of 20 rural villages studied in the eastern Andes of Colombia. Villages ordered by proportion of forest cover. Sample size (*n*) in each village is provide.

**Appendix SM1.** Bernard's probabilistic sampling procedure to estimate the interview sample size.

We apply the Bernard’s formula (formula 1), adjusted to finite populations (formula 2), to calculate the interview sample size in two forest management units (or Unidades Administrativas de Ordenación Forestal – UAOF), the UAFO Farallones and UAFO Guavio (Table S2):

*n = Z2*(P)(Q)/(confidence interval)2 (formula 1)

where *n* is the sample size, *Z* is the area under the normal curve that corresponds to the confidence limit we choose (i.e., when the confidence limit is 95%, then z is 1.96). *P* is the estimated proportion of an attribute that is present in the population, and *Q* is 1-*P.* Since the *p* value in our population was unknown we used *p=*0.5, which is conservative and gives the largest sample size (*see* Bernard 2006).

For finite populations, the sample size *n* was adjusted using the following equation:

*n’* = *n* / 1+ (*n* – 1/*N*) (formula 2)

where *n* is the sample size and *N* is the population size.

To calculate the sample size, we used 95% confidence level, a confidence interval of seven percentage points, and *p* value of 0.5 (*n’=*175).

**Table S1.** Randomly selected villages (n=12) from a set of 23 rural villages with information on human-eagle conflict collected between 2006 and 2012 by CORPOGUAVIO (www.corpoguavio.gov.co). The population size (N) and households in each selected village are provided.

| **Municipality** | **Village** | ***N*** | **Households** | **Selected** |
| --- | --- | --- | --- | --- |
| Ubala | Algodones | 100 | 33 | **yes** |
| Gachalá | Boca de Monte | 440 | 111 | **yes** |
| Gachalá | Cascadas | 45 | 10 | **yes** |
| Gachalá | Chinchorro | 148 | 38 | **yes** |
| Gachalá | Frijolito | 148 | 39 | no |
| Gachalá | Guacamayas | 82 | 22 | **yes** |
| Gachalá | Guarumal | 117 | 28 | no |
| Gachalá | La Diana | 63 | 20 | **yes** |
| Gachalá | La Florida | 194 | 49 | **yes** |
| Gachalá | Los Andes | 96 | 21 | **yes** |
| Gachalá | Minas de Yeso | 204 | 53 | no |
| Gachalá | Montecristo | 250 | 57 | no |
| Gachalá | Murca | 292 | 78 | **yes** |
| Gachalá | Piedra Gorda | 148 | 38 | **yes** |
| Gahcalá | Providencia | 113 | 29 | **yes** |
| Gachalá | San Isidro | 154 | 38 | no |
| Gachalá | Santa Barbara | 105 | 23 | no |
| Gachalá | Sinaí | 143 | 38 | **yes** |
| Gachalá | Tendidos de Rio Negro | 58 | 17 | no |
| Medina | Toquiza | 37 | 9 | **yes** |
|  |  | **2937** | **751** |  |

**Table S2.** Population size (*N*), households, and sample size (*n*) in each selected village.

| **Municipality** | **Village** | ***N*** | **Households** | ***n*** |
| --- | --- | --- | --- | --- |
| Gachalá | Sinaí | 143 | 38 | 8 |
| Gachalá | Murca | 292 | 78 | 19 |
| Gachalá | Boca de Monte | 440 | 111 | 25 |
| Gachalá | Los Andes | 96 | 21 | 5 |
| Gachalá | Guacamayas | 82 | 22 | 2 |
| Gachalá | La Florida | 194 | 49 | 11 |
| Gachalá | La Diana | 63 | 20 | 6 |
| Gachalá | Piedra Gorda | 148 | 38 | 3 |
| Gachalá | Cascadas | 45 | 10 | 2 |
| Gachalá | Chinchorro | 148 | 38 | 3 |
| Gahcalá | Providencia | 113 | 29 | 1 |
| Medina | Toquiza | 37 | 9 | 3 |
| Ubala | Algodones | 100 | 33 | 7 |
| Ubalá | San Luis II | 245 | 71 | 7 |
| Ubalá | El Eden | 25 | 16 | 2 |
| Ubalá | Betania | 259 | 78 | 8 |
| Ubalá | Mundo Nuevo | 62 | 19 | 4 |
| Ubalá | La Playa | 99 | 29 | 3 |
| Gachetá | Sion | 46 | 17 | 0 |
| Gachetá | Muchindote | 1492 | 369 | 35 |
| Gachetá | Salinas | 907 | 174 | 17 |
| Guasca | Concepción | 64 | 16 | 2 |
| Junin | Aposentos | 47 | 15 | 1 |
| Junin | Nemosten | 28 | 7 | 1 |
|  |  | **5175** | **1307** | **175** |

**Table S3.** Descriptive statistic of 20 rural villages studied in the eastern Andes of Colombia. Villages ordered by proportion of forest cover. Sample size (*n*) in each village is provide.

| **Village** | **Forest cover (%)** | **Human density (inhabitants/km2)** | **Yearly domestic fowl losses**  **(Mean ± SD)** | **Killed Eagles** | **People with low tolerance (%)** | **Area (km2)** | **Forest cover (km2)** | ***n*** |
| --- | --- | --- | --- | --- | --- | --- | --- | --- |
| Toquiza | 92 | 0.52 | 0.8 ± 0.9 | 2 | 100 | 70.56 | 65.04 | 3 |
| Cascadas | 84 | 8.06 | 0 | 0 | 100 | 6.58 | 5.52 | 2 |
| Sinaí | 72 | 2.93 | 1.3 ± 0.6 | 2 | 88 | 46.36 | 33.21 | 8 |
| Los Andes | 68 | 4.19 | 0.6 ± 0.6 | 0 | 100 | 19.57 | 13.22 | 5 |
| Algodones | 62 | 3.80 | 0.5 ± 0.6 | 1 | 71 | 26.34 | 16.325 | 7 |
| Boca de Monte | 61 | 17.42 | 0.5 ± 0.9 | 0 | 64 | 23.14 | 14.026 | 25 |
| EL Eden | 53 | 0.44 | 0 | 0 | 50 | 57.28 | 30.47 | 2 |
| Piedra Gorda | 46 | 19.73 | 0.7 ± 0.6 | 1 | 100 | 10.08 | 4.63 | 3 |
| Betania | 34 | 13.00 | 0.3 ± 0.5 | 0 | 25 | 19.93 | 6.84 | 8 |
| Mundo Nuevo | 30 | 3.13 | 0 | 0 | 0 | 19.8 | 6 | 4 |
| Chinchorro | 28 | 12.45 | 2.8 ± 1.0 | 0 | 100 | 6.74 | 1.92 | 3 |
| San Luis II | 25 | 6.86 | 0.3 ± 0.5 | 0 | 0 | 35.71 | 8.986 | 7 |
| Concepción | 20 | 0.67 | 0 | 0 | 0 | 95.55 | 19.273 | 2 |
| Salinas | 18 | 21.46 | 0.5 ± 0.5 | 0 | 0 | 42.27 | 7.679 | 17 |
| Muchindote | 16 | 23.72 | 0.3 ± 0.4 | 0 | 31 | 62.91 | 10.119 | 35 |
| La Florida | 13 | 38.07 | 1 ± 1.7 | 0 | 55 | 4.7 | 0.588 | 11 |
| Guacamayas | 10 | 16.09 | 1.9 ± 1.6 | 0 | 100 | 5.41 | 0.553 | 2 |
| La Diana | 6 | 13.51 | 0.7 ± 0.6 | 0 | 83 | 4.4 | 0.283 | 6 |
| La Playa | 0 | 49.90 | 0.3 ± 0.6 | 0 | 0 | 1.98 | 0 | 3 |
| Murca | 0 | 92.97 | 0.1 ± 0.3 | 0 | 95 | 3.13 | 0 | 19 |

**Supporting references**

Bernard, H.R., 2006. Research methods in anthropology: Qualtitative and quantitative approaches, 4th ed. Oxford.
